# Supplementary material for: Quantifying the cost of in-kind contributions to a multidonor-funded health research capacity-building programme: the case of the Consortium for Advanced Research Training in Africa
Source: PubMed Central journal article supplement — BMJ Glob Health. 2020 Jun 7;5(6):e002286. doi: 10.1136/bmjgh-2020-002286 (PMC7282305; doi:10.1136/bmjgh-2020-002286), 2020-06-07
Supplement: bmjgh-2020-002286supp001.pdf [file bmjgh-2020-002286supp001.pdf]

**Supplementary file 1: Pay scales for costing reported in hourly wages (USD<sup>1</sup>)**

| Qualification level        | Witwatersrand (for local partners) |       |       | Gothenburg/ Warwick (for international partners) <sup>2</sup> |       |       | APHRC    |       |       |
|----------------------------|------------------------------------|-------|-------|---------------------------------------------------------------|-------|-------|----------|-------|-------|
|                            | Midpoint                           | Max   | Min   | Midpoint                                                      | Max   | Min   | Midpoint | Max   | Min   |
| <b>Full professor</b>      | 65.09                              | 78.11 | 52.07 | 69.61                                                         | --    | --    | 77.89    | 89.58 | 66.21 |
| <b>Associate professor</b> | 53.37                              | 64.04 | 42.69 | 54.24                                                         | --    | --    | 59.92    | 71.90 | 47.93 |
| <b>Senior Lecturer</b>     | 43.77                              | 52.52 | 35.01 | 40.39                                                         | 43.29 | 38.45 | 46.09    | 55.31 | 36.87 |
| <b>Lecturer</b>            | 35.89                              | 43.07 | 28.70 | 33.85                                                         | 35.60 | 32.27 | 35.46    | 42.55 | 28.36 |

<sup>1</sup> Average exchange rates from Jan 1 2009 to Dec 31 2012 were as follows: 1 USD = 7.80 Rand, 7.03 SEK, 0.63 GBP

<sup>2</sup> Average of Gothenburg & Warwick pay scales were used to calculate pay scale for international partners; note only midpoint salaries were available for all levels at Gothenburg and for Full professor / Associate professor/Reader at Warwick
